# Supplementary material for: Reassessment of weak parent-of-origin expression bias shows it rarely exists outside of known imprinted regions
Source: eLife journal article supplement (doi:10.7554/elife.83364), 2023-03-14
Supplement: supp [file elife_poa_e83364_Figure_2_figure_supplement_1.pdf › elife_poa_e83364_Figure_2_figure_supplement_1.pdf]

Known Imprinted  
Genes

Class 3 Genes

Class 2 Genes

Class 1 Genes

Mean TPM  
(Log<sub>2</sub>)

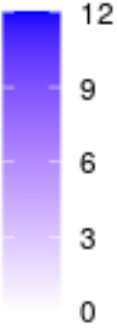

|         |    |      |       |        |         |     |       |        |         |          |
|---------|----|------|-------|--------|---------|-----|-------|--------|---------|----------|
| Brain   | Cb | Hypo | Liver | Muscle | ARN     | DRN | Liver | Muscle | P8 - Cb | P60 - Cb |
| Study A |    |      |       |        | Study B |     |       |        | Study C |          |
