# Supplementary figures and images for: Reassessment of weak parent-of-origin expression bias shows it rarely exists outside of known imprinted regions
Source: eLife journal article supplement (doi:10.7554/elife.83364), 2023-03-14

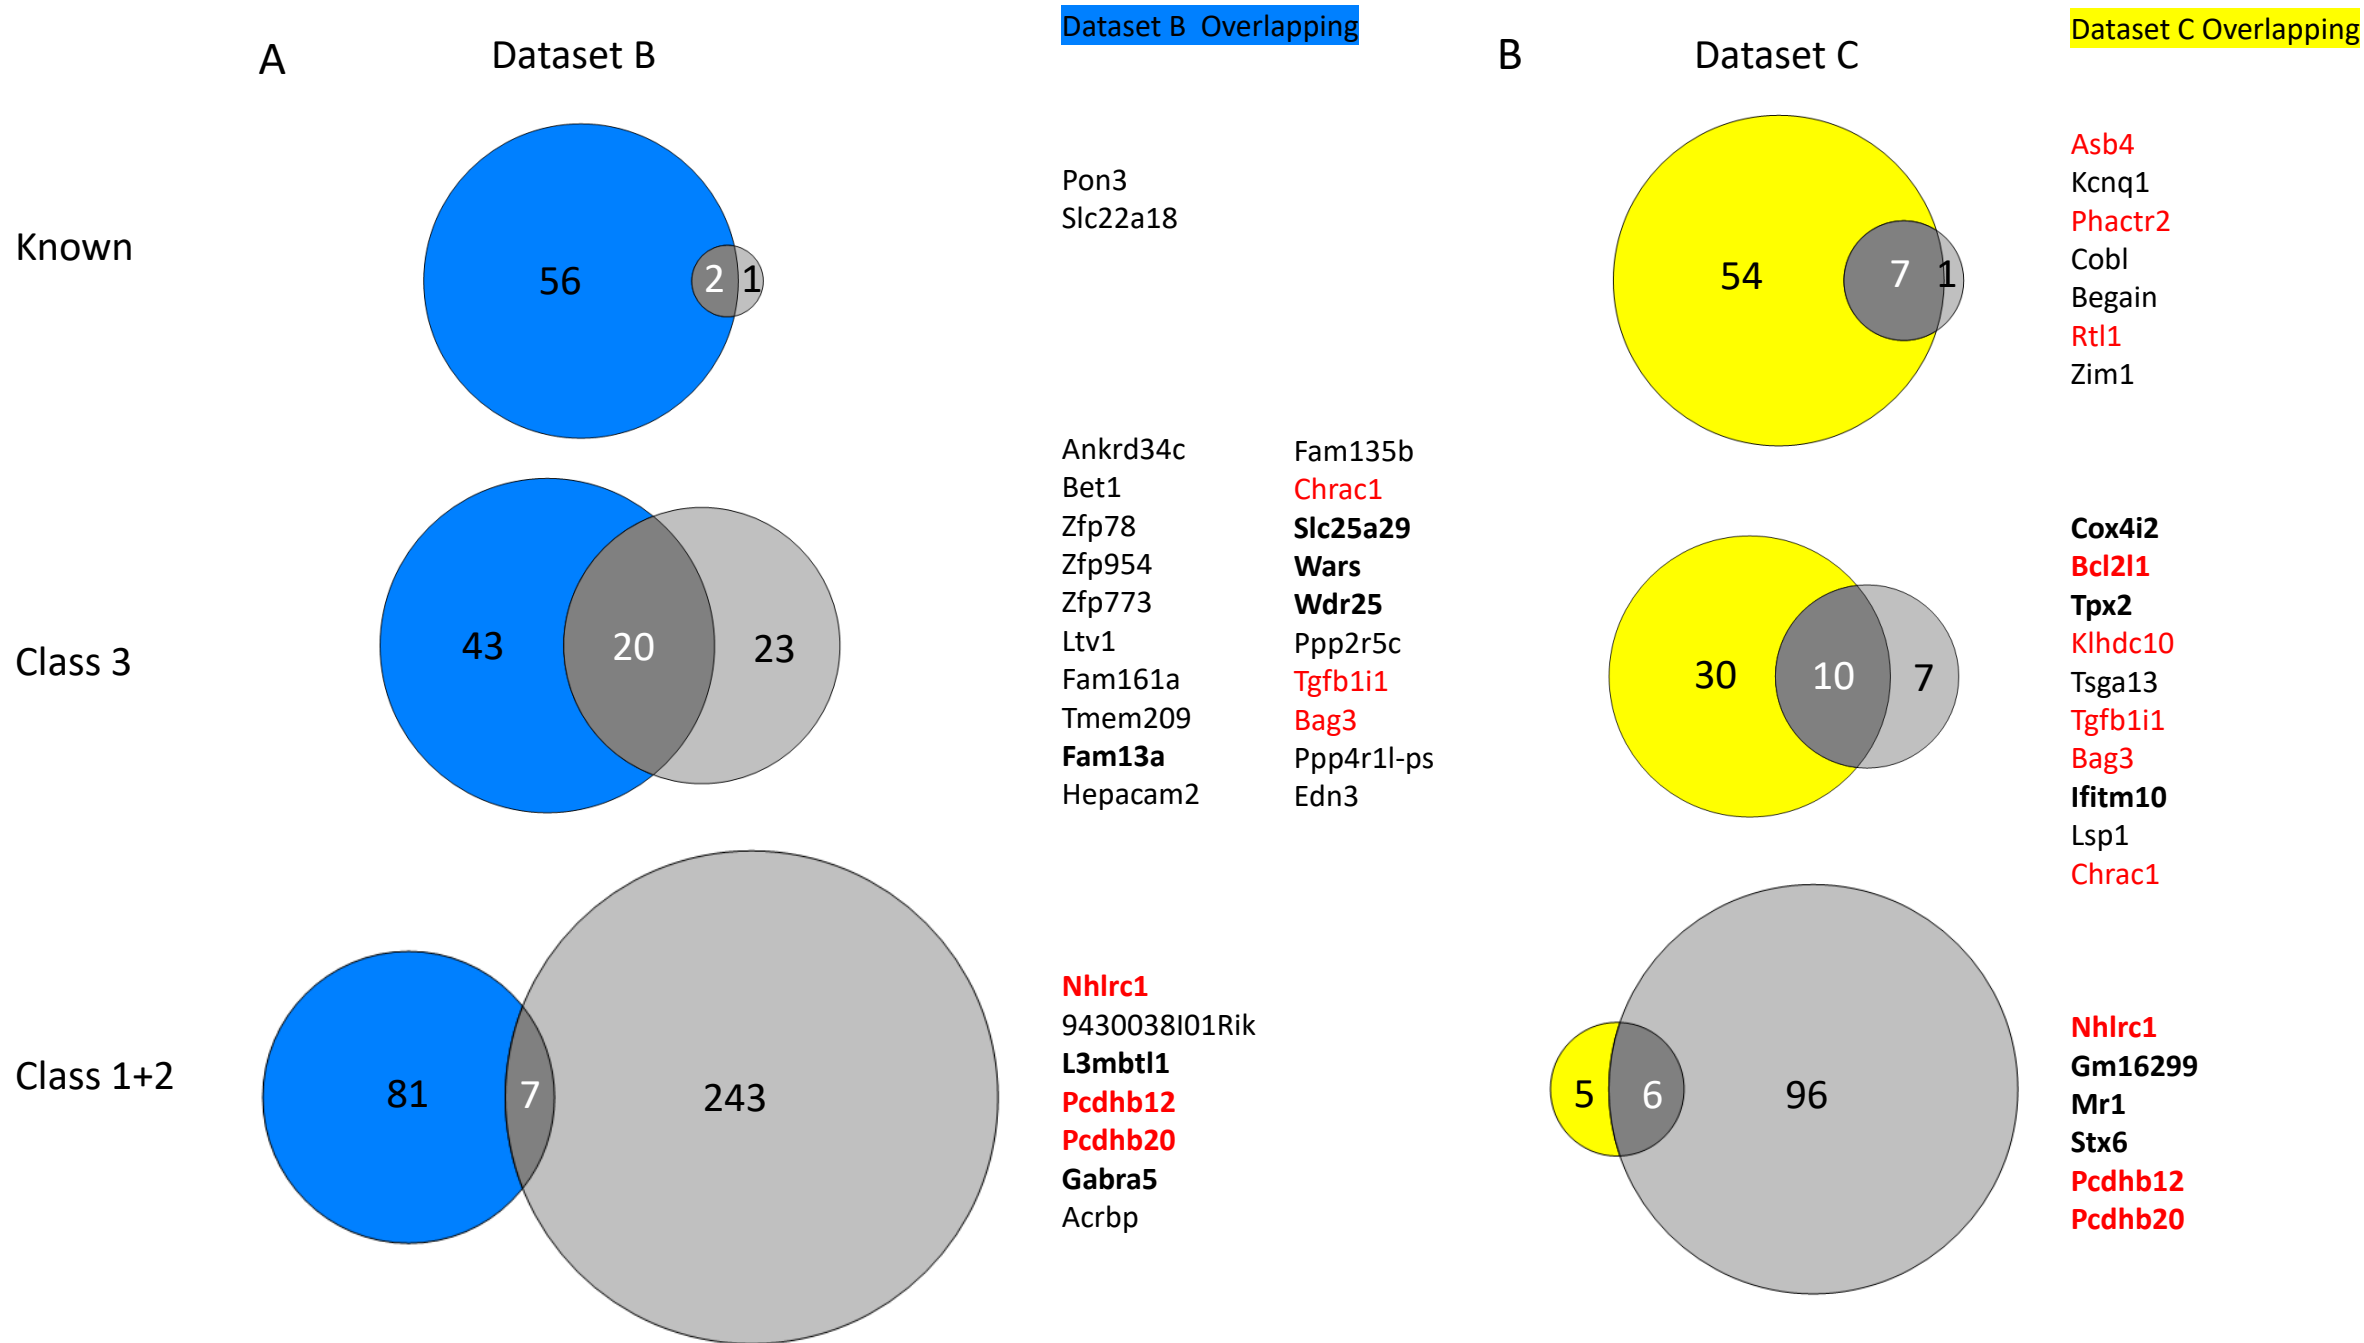

Supplement: supp [file elife_poa_e83364_Figure_2_figure_supplement_2.pdf › elife_poa_e83364_Figure_2_figure_supplement_2.pdf]

A

Nhlrc1

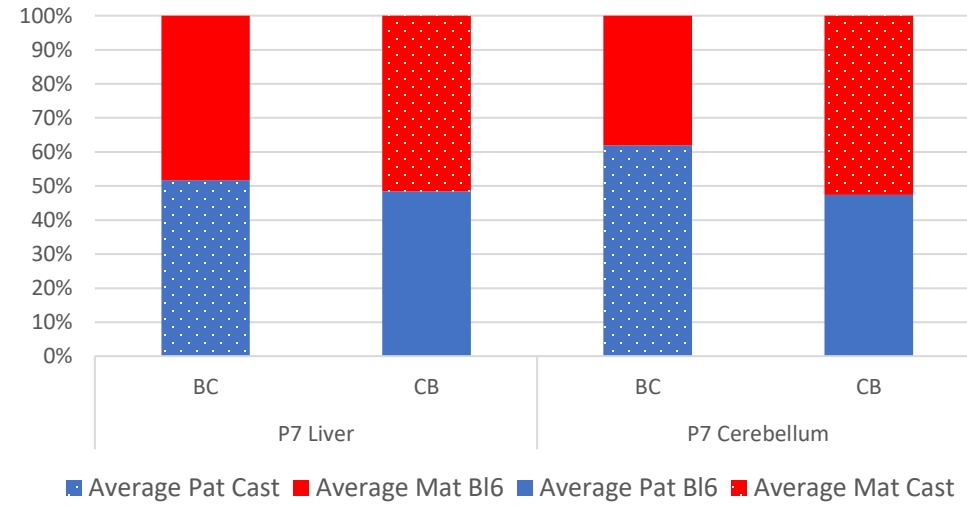

B

Coro1c-pseudogene

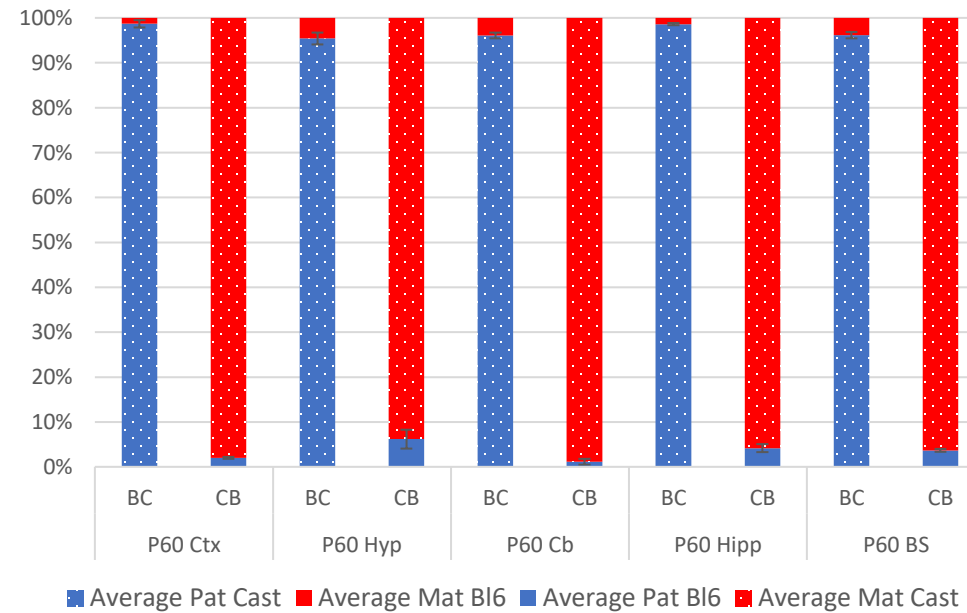

Supplement: supp [file elife_poa_e83364_Figure_5_figure_supplement_1.pdf › elife_poa_e83364_Figure_5_figure_supplement_1.pdf]

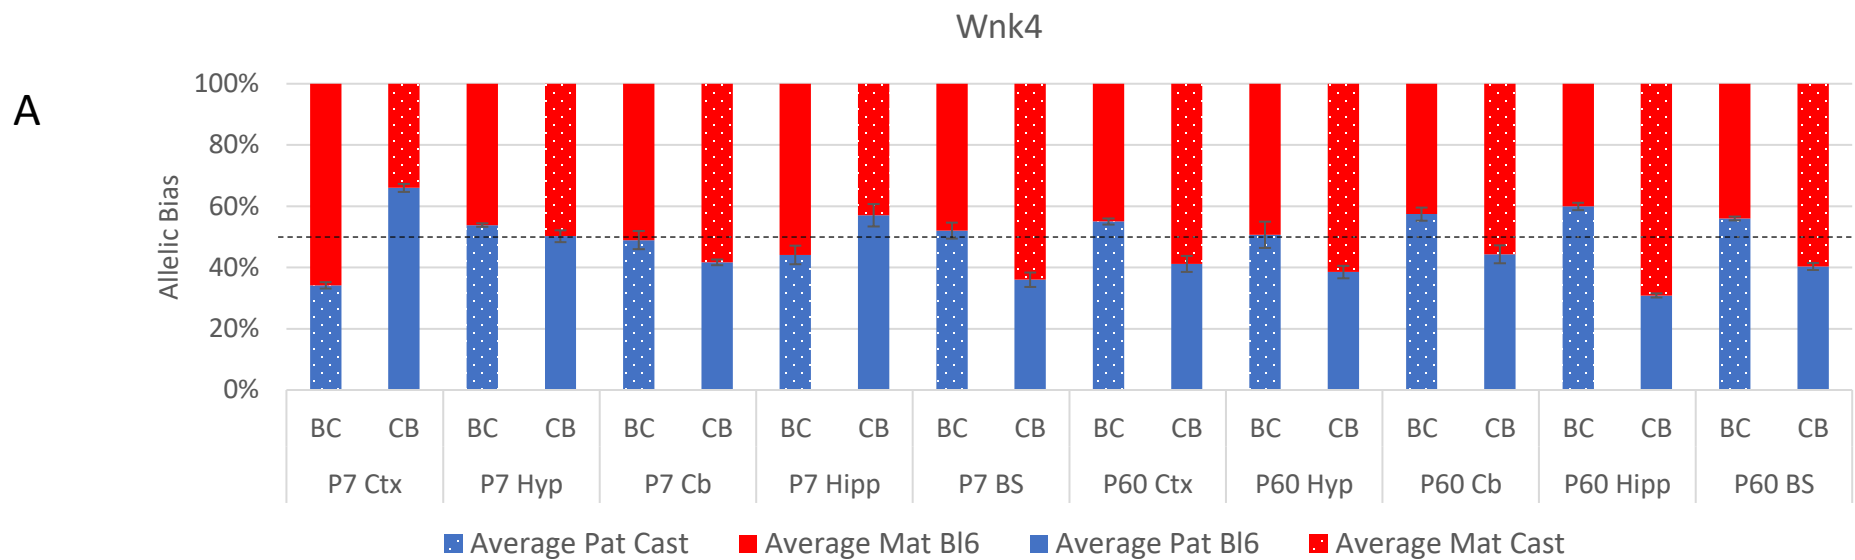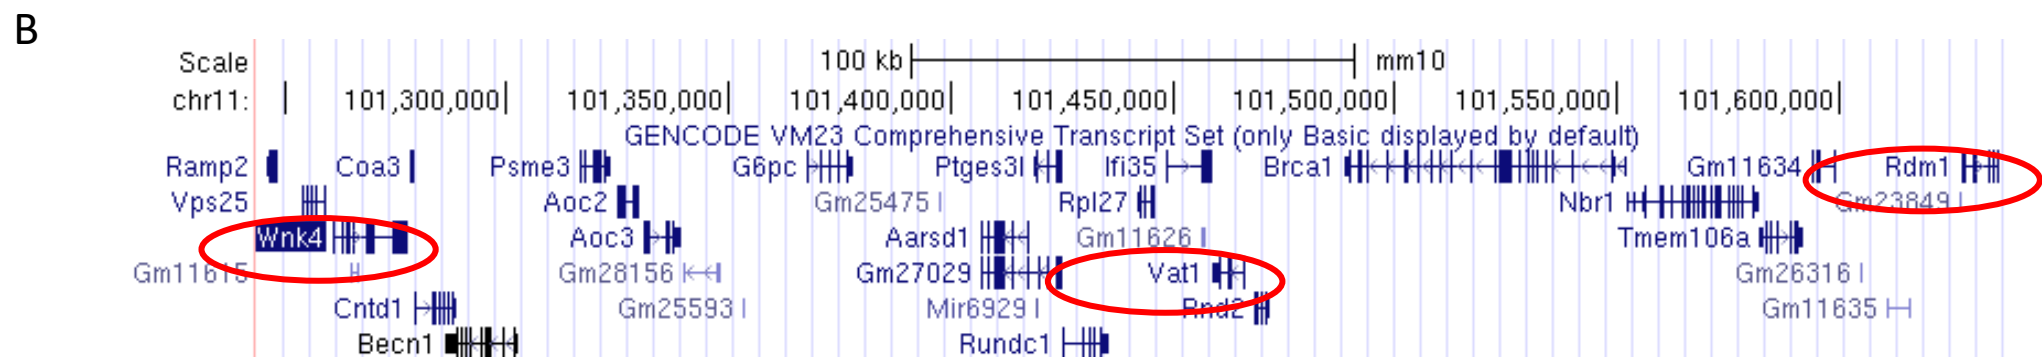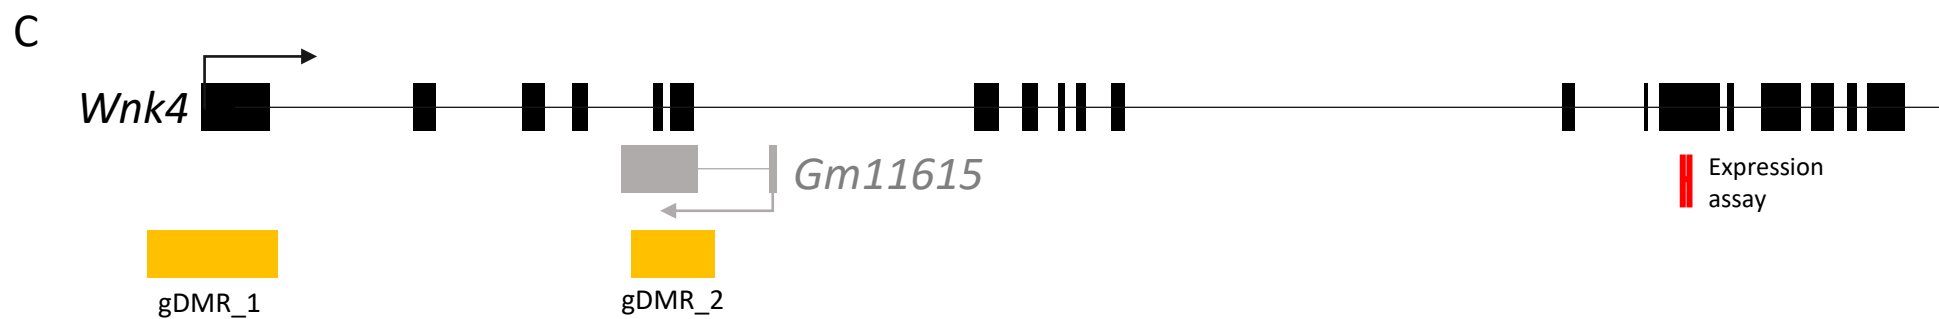

Supplement: supp [file elife_poa_e83364_Figure_5_figure_supplement_2.pdf › elife_poa_e83364_Figure_5_figure_supplement_2.pdf]

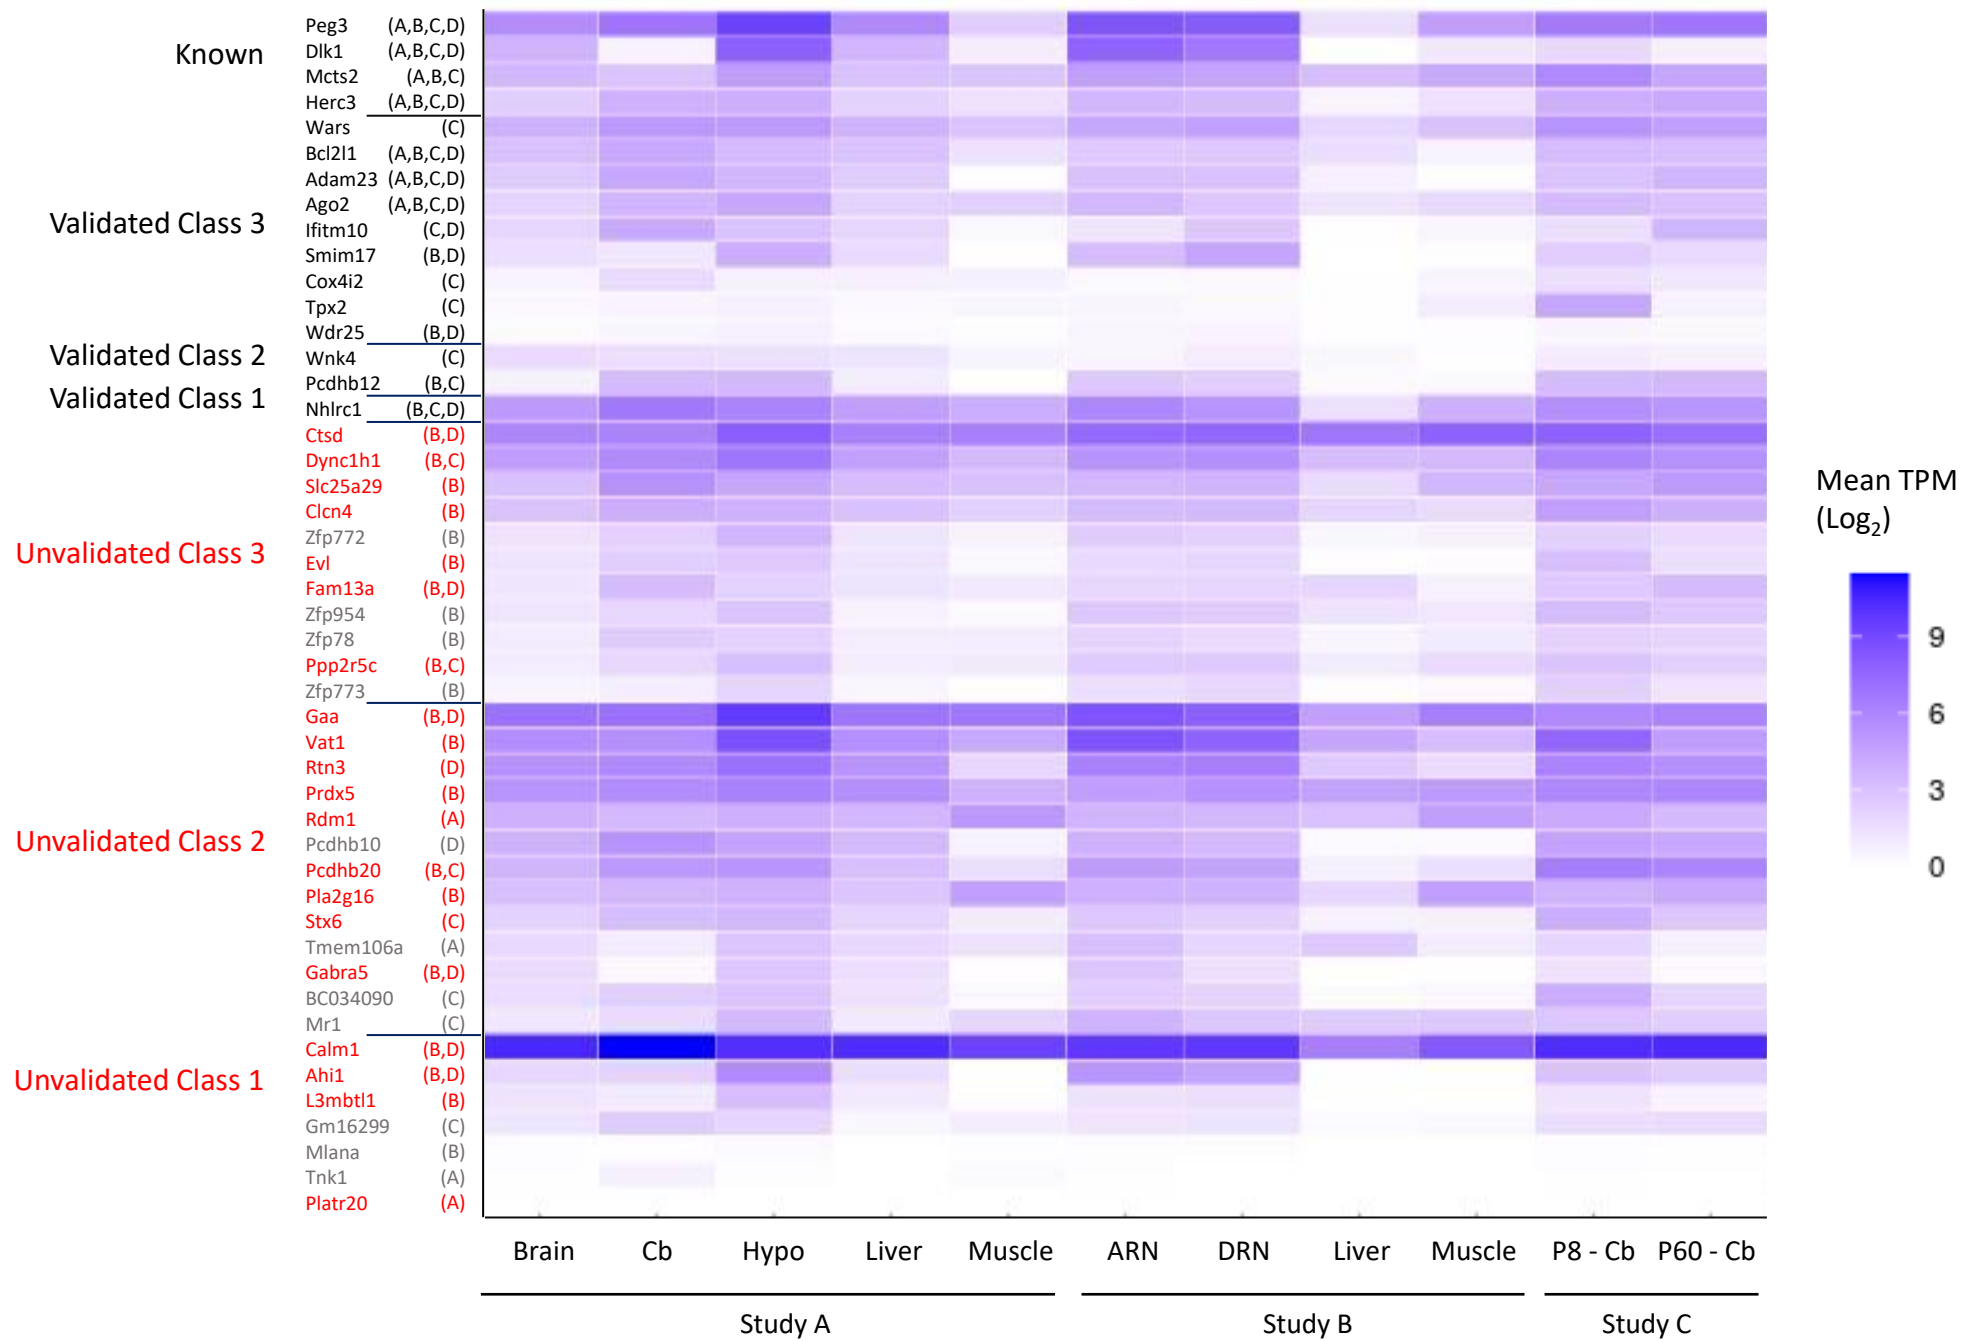

Supplement: supp [file elife_poa_e83364_Figure_5_figure_supplement_3.pdf › elife_poa_e83364_Figure_5_figure_supplement_3.pdf]

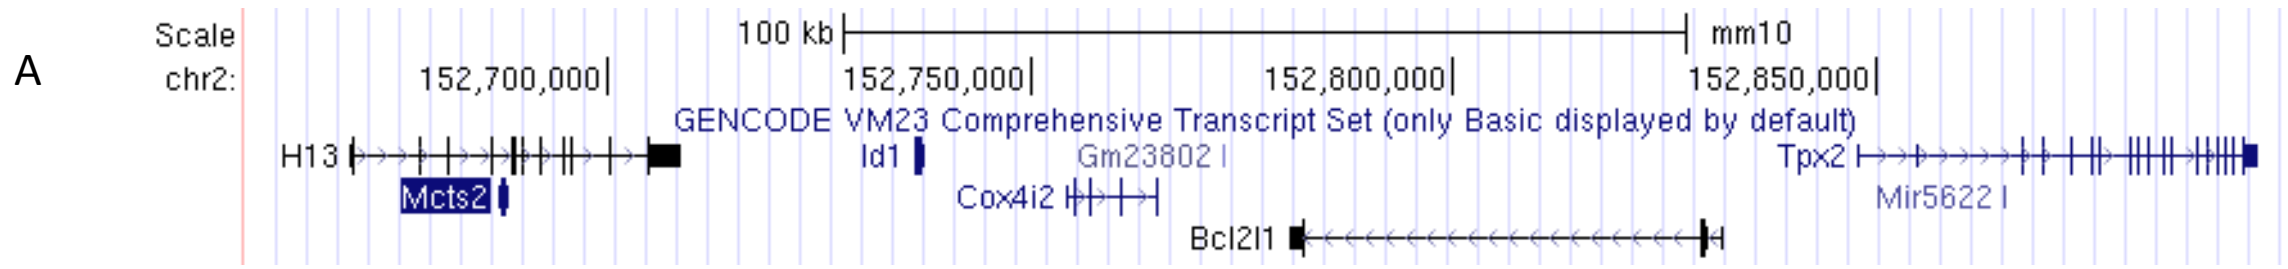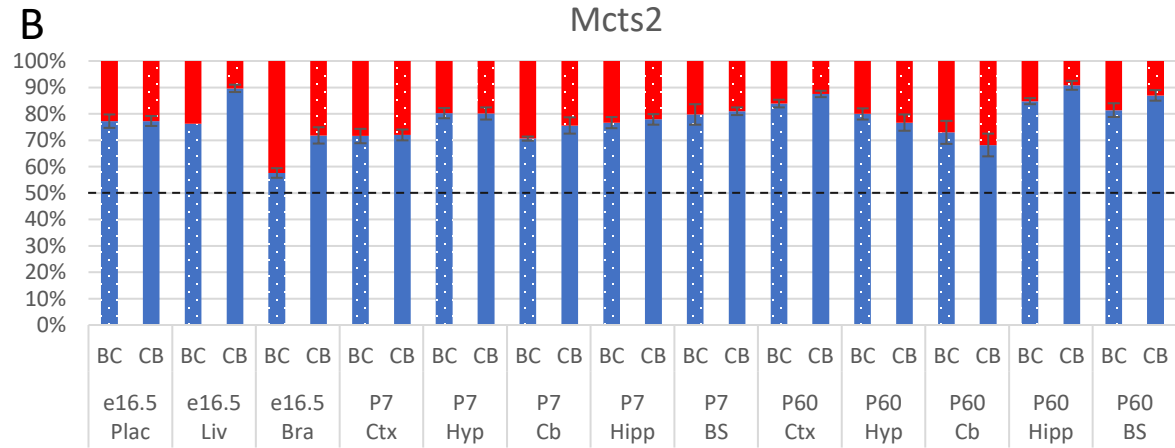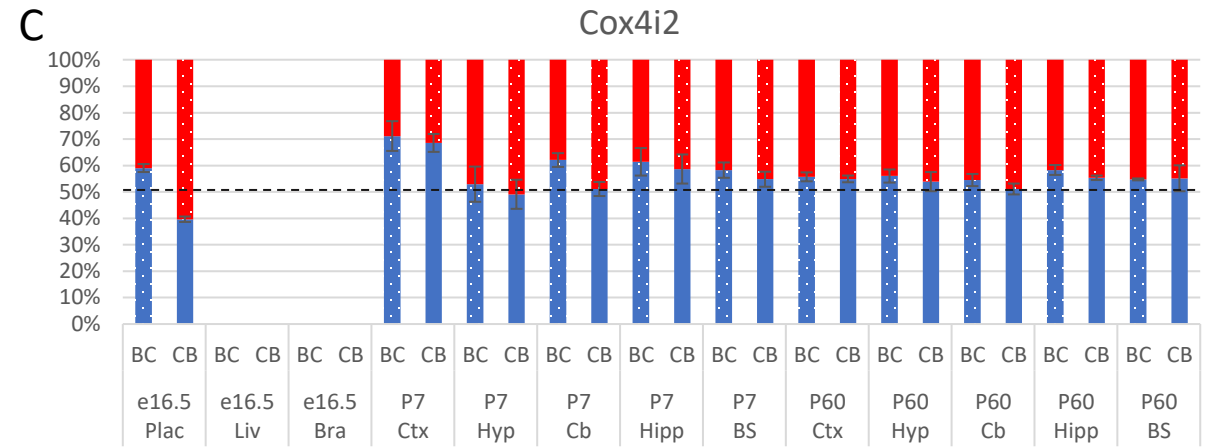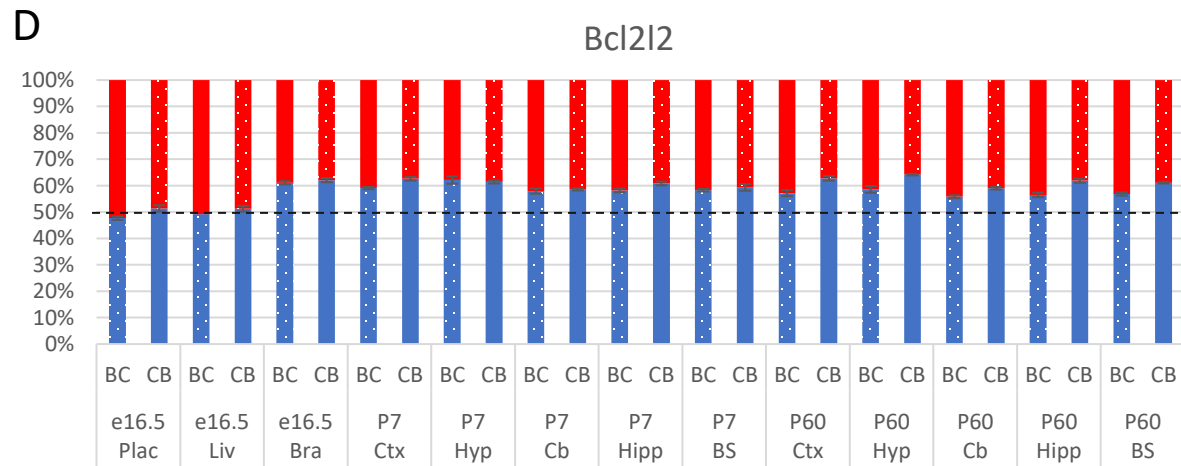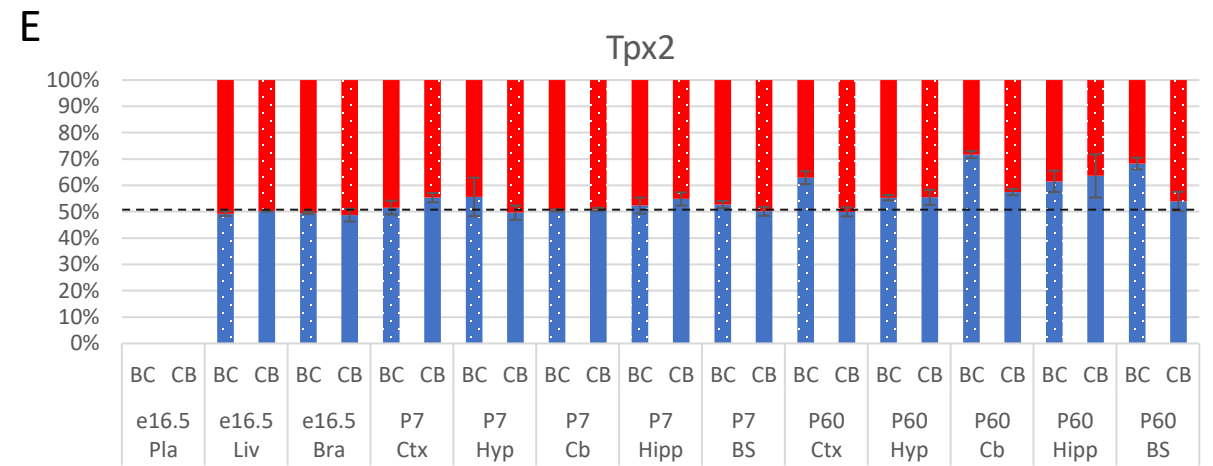

■ Average Pat Cast ■ Average Mat Bl6 ■ Average Pat Bl6 ■ Average Mat Cast

Supplement: supp [file elife_poa_e83364_Figure_6_figure_supplement_1.pdf › elife_poa_e83364_Figure_6_figure_supplement_1.pdf]

A

Adam23

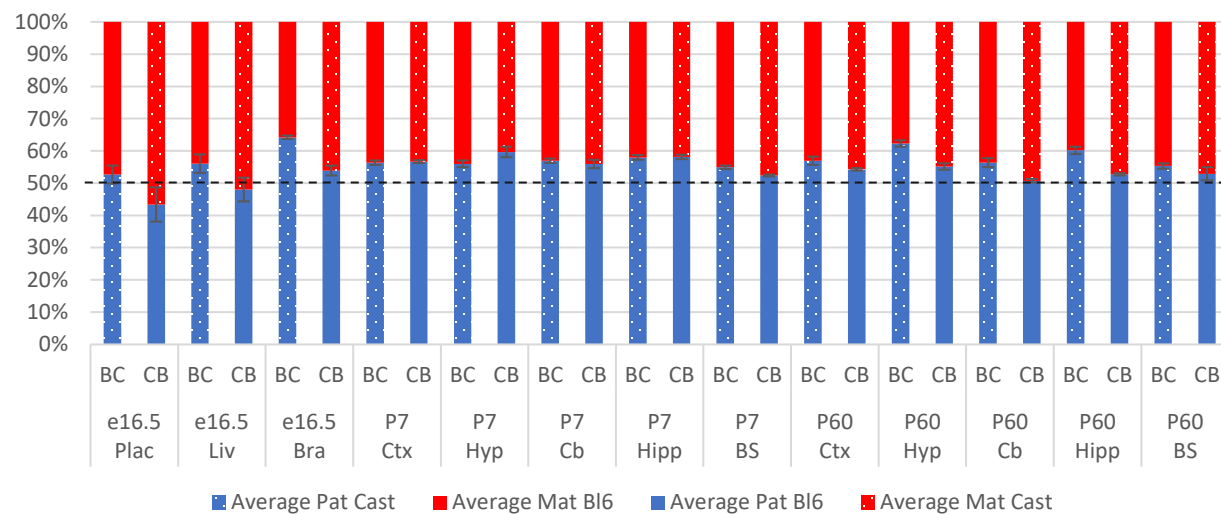

B

Ifitm10

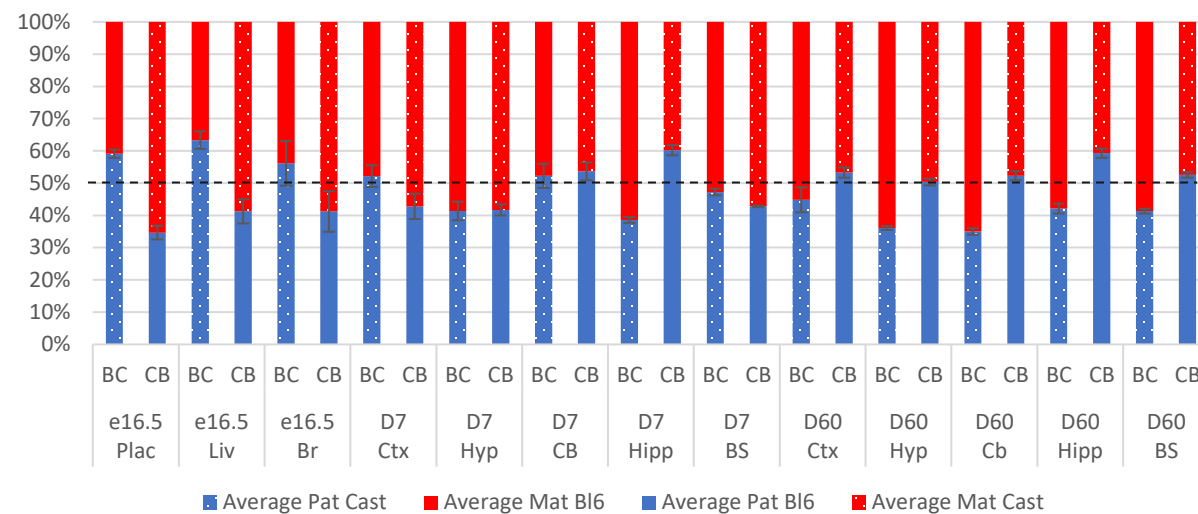

C

Ago2

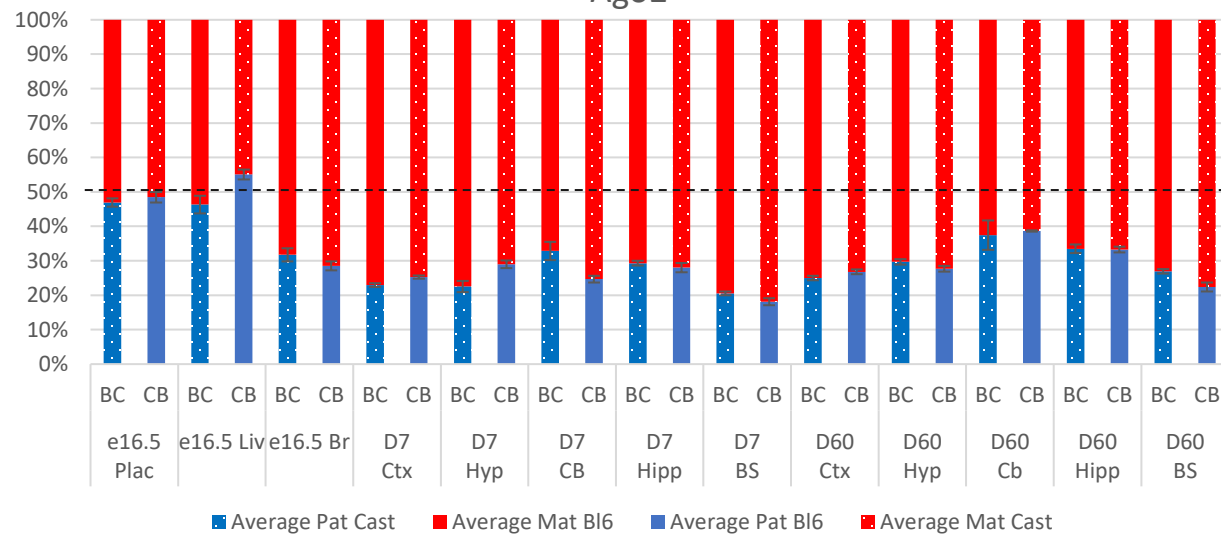

Supplement: supp [file elife_poa_e83364_Figure_6_figure_supplement_2.pdf › elife_poa_e83364_Figure_6_figure_supplement_2.pdf]

A

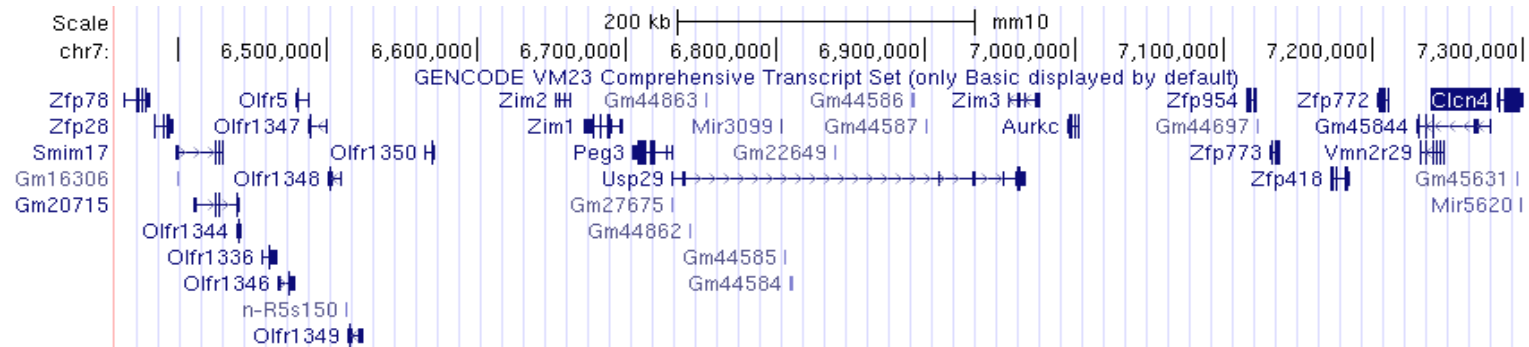

B

Smim17

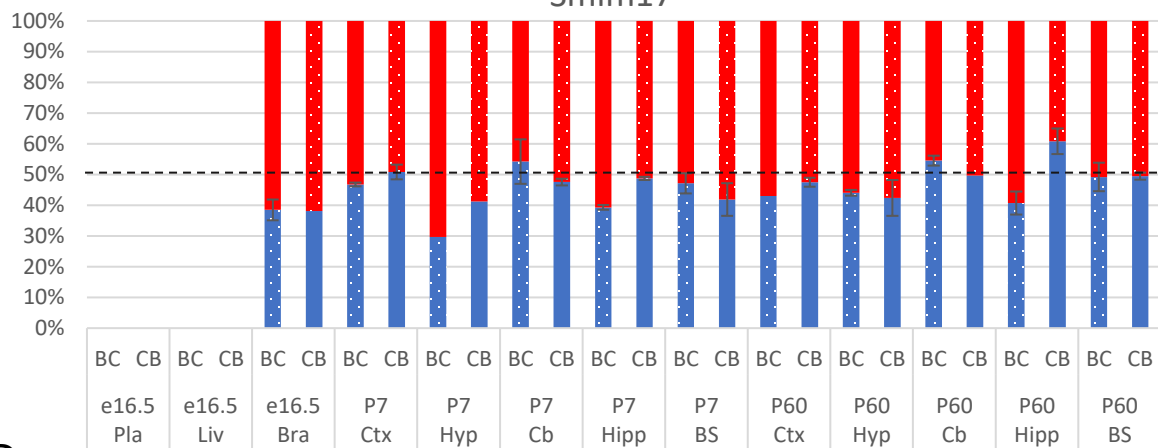

C

Peg3

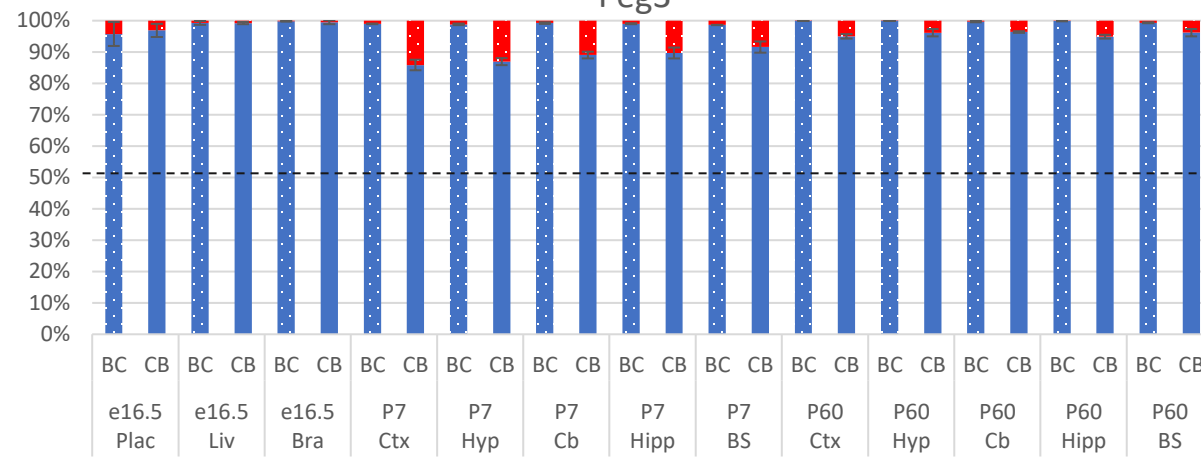

D

Clcn4

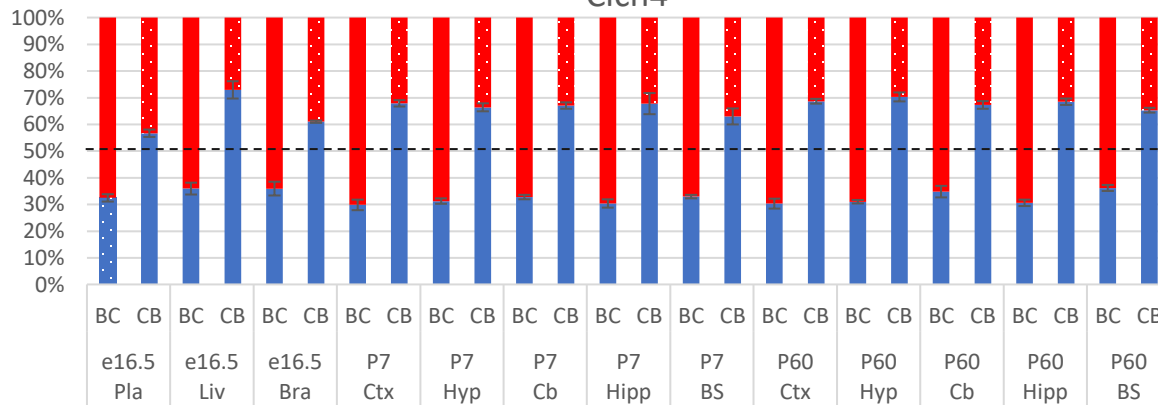

■ Average Pat Cast ■ Average Mat Bl6 ■ Average Pat Bl6 ■ Average Mat Cast

Supplement: supp [file elife_poa_e83364_Figure_6_figure_supplement_3.pdf › elife_poa_e83364_Figure_6_figure_supplement_3.pdf]
